# Supplementary material for: Differential phenotypes of memory CD4 and CD8 T cells in the spleen and peripheral tissues following immunostimulatory therapy
Source: PubMed Central journal article supplement (PMC5394626; doi:10.1186/s40425-017-0235-4), 2017-04-18
Supplement: 40425_2017_235_MOESM1_ESM.pdf [file 40425_2017_235_MOESM1_ESM.pdf]

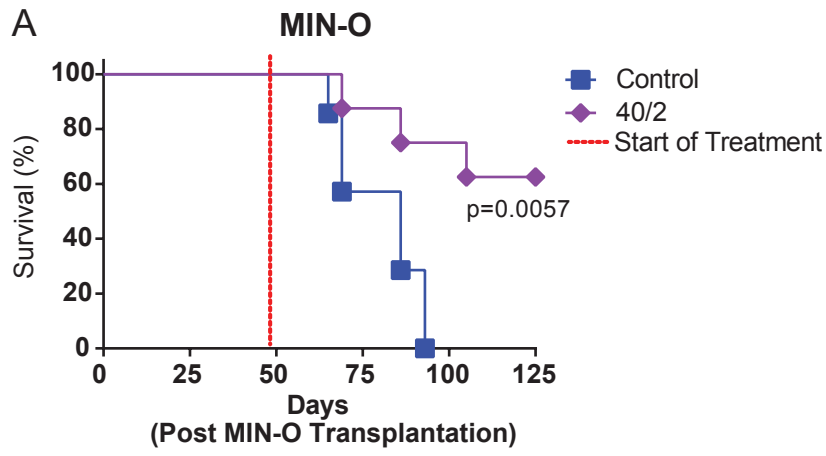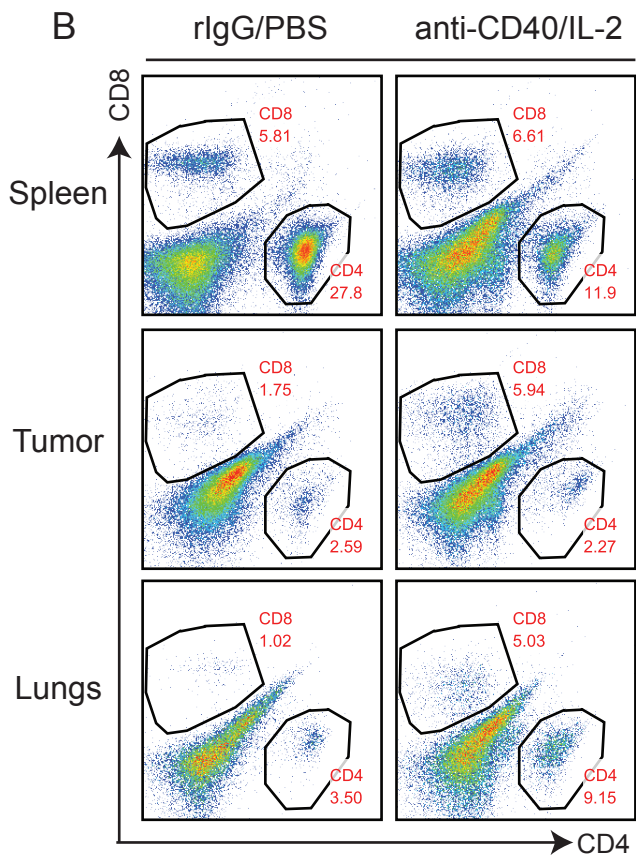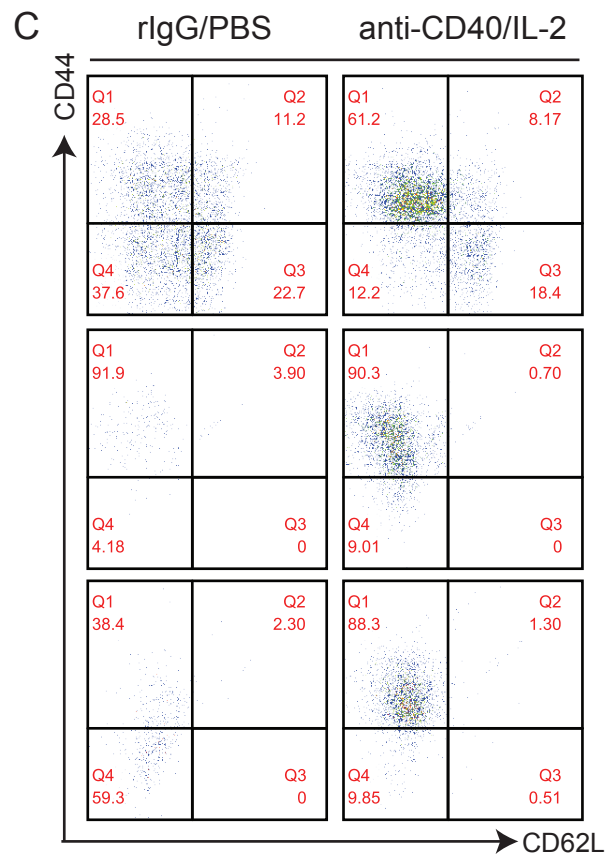

**Supplemental Figure 1**
